# Supplementary material
Source: PubMed Central journal article supplement (PMC3653583)
Supplement: NIHMS401497-supplement-01.pdf [file NIHMS401497-supplement-01.pdf]

**Supplemental Table 1. Food Outcomes for 4-Year Olds in Center Care<sup>1,2</sup> (N=4,100)**

|                                 | Milk | Fruit | Juice | Fruit or Juice <sup>3</sup> | Vegetables | Salty Snacks | Sweet Snacks | Fast Food | Soda |
|---------------------------------|------|-------|-------|-----------------------------|------------|--------------|--------------|-----------|------|
|                                 | %    | %     | %     | %                           | %          | %            | %            | %         | %    |
| Child did not consume           | 2.4  | 3.0   | 7.7   | 1.0                         | 4.1        | 11.2         | 4.2          | 25.9      | 30.3 |
| One to three times, past 7 days | 4.0  | 12.4  | 16.6  | 1.7                         | 14.6       | 49.6         | 35.3         | 63.7      | 36.5 |
| Four to six times, past 7 days  | 7.9  | 11.7  | 8.8   | 1.0                         | 12.4       | 11.5         | 14.9         | 2.5       | 6.5  |
| Once a day                      | 15.4 | 30.3  | 28.9  | 24.4                        | 31.6       | 20.2         | 32.4         | 5.4       | 15.1 |
| Twice a day                     | 29.8 | 27.8  | 21.2  | 22.7                        | 26.9       | 5.1          | 8.9          | 1.3       | 6.3  |
| Three times a day               | 24.4 | 10.1  | 10.1  | 18.4                        | 6.8        | 1.2          | 2.6          | 0.9       | 2.9  |
| Four or more times a day        | 16.3 | 4.7   | 6.7   | 29.9                        | 3.6        | 1.2          | 1.8          | 0.3       | 2.4  |

Table Notes

1. Sample size rounded to nearest 50.
2. Sample includes all observations with non-missing CACFP participation.
3. "Fruit or juice" responses are constructed by combining responses to the fruit and juice questions.
4. Within each column, the outcome used for regressions is the combined highlighted categories vs. the combined un-highlighted categories.

Supplemental Table 2: Propensity-Score-Weighted Means<sup>e</sup>,  
 4-Year-Old Low-Income Children in Child Care Centers

|                                                      | Low-Income Families <sup>a</sup> |            |
|------------------------------------------------------|----------------------------------|------------|
|                                                      | CACFP Participation              |            |
|                                                      | No<br>(1)                        | Yes<br>(2) |
| <i>1. Outcomes</i>                                   |                                  |            |
| Child's healthy food intake                          |                                  |            |
| Milk, 2+ cups/day                                    | 0.65                             | 0.72       |
| Fruit or Juice, 3+ servings/day                      | 0.53                             | 0.56       |
| Vegetables, 2+ servings/day                          | 0.33                             | 0.42       |
| Child's avoidance of less-healthy foods              |                                  |            |
| Salty Snacks, <= 1 - 3 servings/week                 | 0.53                             | 0.57       |
| Fast Food <= 1 - 3 servings/week                     | 0.86                             | 0.85       |
| Sweet Snacks, <= 1 - 3 servings/week                 | 0.44                             | 0.43       |
| Sodas <= to 1 - 3 servings/week                      | 0.59                             | 0.53       |
| Child's weight-for-height (measured)                 |                                  |            |
| Underweight                                          | 0.05                             | 0.03       |
| Overweight                                           | 0.23                             | 0.18       |
| Overweight or at-risk of overweight                  | 0.38                             | 0.37       |
| Child and household food insecurity                  |                                  |            |
| Household is food insecure                           | 0.43                             | 0.41       |
| Children are food insecure                           | 0.25                             | 0.26       |
| <i>2. Child characteristics</i>                      |                                  |            |
| Race/ethnicity                                       |                                  |            |
| Hispanic                                             | 0.29                             | 0.25       |
| Non-Hispanic, White                                  | 0.22                             | 0.26       |
| Non-Hispanic, Black                                  | 0.32                             | 0.31       |
| Non-Hispanic, Other                                  | 0.16                             | 0.18       |
| Child was born low birth weight                      | 0.29                             | 0.28       |
| Mother ever breast fed child                         | 0.50                             | 0.55       |
| Child had < 2 check-ups <sup>c</sup> in last 2 years | 0.16                             | 0.16       |
| <i>3. Family income and neighborhood poverty</i>     |                                  |            |
| Family Income-to-Needs Ratio <sup>d</sup>            | 0.94                             | 1.00       |
| Since last interview, family Food Stamps use         | 0.61                             | 0.59       |
| Since last interview, family TANF use                | 0.23                             | 0.22       |
| Since last interview, child WIC use                  | 0.70                             | 0.67       |
| Young child poverty rate in ZIP code                 | 26.8                             | 25.1       |

(table continues)

Supplemental Table 2 (continued):

|                                             | Low- Income Families <sup>a</sup> |            |
|---------------------------------------------|-----------------------------------|------------|
|                                             | CACFP Participation               |            |
|                                             | No<br>(1)                         | Yes<br>(2) |
| <i>4. Mother characteristics</i>            |                                   |            |
| Mother's age                                | 29.1                              | 29.9       |
| Mother's education                          |                                   |            |
| Less than high school                       | 0.40                              | 0.39       |
| High school graduate                        | 0.30                              | 0.27       |
| Some college                                | 0.25                              | 0.30       |
| Bachelor's degree or higher                 | 0.04                              | 0.05       |
| Mother married                              | 0.42                              | 0.45       |
| Mother's employment status                  |                                   |            |
| Not employed                                | 0.45                              | 0.45       |
| Full-time                                   | 0.36                              | 0.37       |
| Part-time                                   | 0.19                              | 0.18       |
| No English at home or mother not born in US | 0.25                              | 0.25       |
| Household has rules about food              | 0.64                              | 0.65       |
| <i>5. Center characteristics</i>            |                                   |            |
| Director experience at center, years        | 6.8                               | 7.3        |
| Sponsorship and Accreditation               |                                   |            |
| Center for-profit                           | 0.11                              | 0.11       |
| Center not sponsored, non-profit            | 0.64                              | 0.59       |
| Center sponsored, non-profit                | 0.25                              | 0.30       |
| Center accredited                           | 0.63                              | 0.59       |
| Licensure and Size                          |                                   |            |
| Center Licensed                             | 0.88                              | 0.84       |
| Center Licensed to Care Size                | 154.6                             | 122.9      |
| <i>6. Lagged child outcomes (age 2)</i>     |                                   |            |
| Food Insecurity at Age 2                    |                                   |            |
| Not food insecure                           | 0.12                              | 0.13       |
| Household food insecure only                | 0.73                              | 0.69       |
| Household and children food insecure        | 0.16                              | 0.17       |
| Child milk consumption at age 2             |                                   |            |
| No milk consumption                         | 0.24                              | 0.27       |
| Drinks milk with meals only                 | 0.24                              | 0.25       |
| Drinks milk with snacks only                | 0.23                              | 0.22       |
| Drinks milk with snacks and meals           | 0.29                              | 0.25       |
| Child BMI at age 2                          | 17.6                              | 17.5       |
| Unweighted sample size <sup>b</sup>         | 500                               | 1300       |

*Note.* HS = Head Start; TANF = Temporary Assistance for Needy Families; WIC = Supplemental Feeding Program for Women, Infants and Children; CACFP = Child and Adult Care Food Program; BMI = Body Mass Index; HH=Household.

<sup>a</sup>Family incomes less than 185% of federal poverty line or participates in TANF or Food Stamps.

<sup>b</sup>Sample size rounded to the nearest 50 per ECLS-B license agreement.

<sup>c</sup>Check-ups for well-child care only.

<sup>d</sup>Family income divided by the federal poverty threshold specific to the family size and age composition (number of adults and number of children).

<sup>e</sup>Item-missing data for covariates have been imputed.

**Supplemental Table 3. Odds Ratios (OR) Standard Errors (SE) from Propensity Score Weighted Logistic Regressions, Low-Income 4-year olds in Center Care.**

|                                              | Mean<br>(SD)  | Milk<br>OR<br>(SE) | Fruit or Juice<br>OR<br>(SE) | Vegetables<br>OR<br>(SE) | Salty<br>OR<br>(SE) | Fast Food<br>OR<br>(SE) | Sweets<br>OR<br>(SE) | Soda<br>OR<br>(SE) | Underweight<br>OR<br>(SE) | Overweight<br>OR<br>(SE) | Risk of Overweight<br>OR<br>(SE) | Household Food<br>Insecurity<br>OR<br>(SE) | Child Food Insecurity<br>OR<br>(SE) |
|----------------------------------------------|---------------|--------------------|------------------------------|--------------------------|---------------------|-------------------------|----------------------|--------------------|---------------------------|--------------------------|----------------------------------|--------------------------------------------|-------------------------------------|
| CACFP                                        | 0.72          | 1.39*<br>(0.22)    | 1.20<br>(0.18)               | 1.57*<br>(0.25)          | 1.16<br>(0.18)      | 0.92<br>(0.18)          | 0.96<br>(0.15)       | 0.77<br>(0.12)     | 0.54<br>(0.22)            | 0.79<br>(0.16)           | 1.03<br>(0.18)                   | 0.85<br>(0.13)                             | 0.98<br>(0.16)                      |
| Child Age in Months                          | 53.0<br>(3.9) | 1.04+<br>(0.02)    | 1.01<br>(0.02)               | 0.98<br>(0.02)           | 1.01<br>(0.02)      | 0.97<br>(0.03)          | 1.00<br>(0.02)       | 0.99<br>(0.02)     | 0.94<br>(0.05)            | 1.02<br>(0.03)           | 1.01<br>(0.02)                   | 0.99<br>(0.02)                             | 1.02<br>(0.02)                      |
| Child Race (Ref: White)                      |               |                    |                              |                          |                     |                         |                      |                    |                           |                          |                                  |                                            |                                     |
| Non-Hispanic Black                           | 0.25          | 0.83<br>(0.21)     | 1.65*<br>(0.38)              | 0.79<br>(0.17)           | 0.85<br>(0.20)      | 0.76<br>(0.24)          | 1.27<br>(0.31)       | 0.62+<br>(0.15)    | 2.16<br>(1.26)            | 1.57<br>(0.49)           | 1.47<br>(0.37)                   | 0.96<br>(0.22)                             | 1.08<br>(0.31)                      |
| Non-Hispanic Other                           | 0.06          | 1.39<br>(0.40)     | 1.91*<br>(0.55)              | 1.51<br>(0.46)           | 0.91<br>(0.26)      | 0.91<br>(0.48)          | 0.70<br>(0.20)       | 0.70<br>(0.22)     | 1.43<br>(1.12)            | 2.04*<br>(0.72)          | 1.89*<br>(0.58)                  | 1.27<br>(0.40)                             | 1.08<br>(0.34)                      |
| Hispanic                                     | 0.31          | 1.69+<br>(0.52)    | 1.65+<br>(0.43)              | 0.75<br>(0.19)           | 0.95<br>(0.25)      | 0.58<br>(0.21)          | 1.24<br>(0.32)       | 0.64<br>(0.18)     | 4.07*<br>(2.29)           | 1.95+<br>(0.72)          | 1.65<br>(0.52)                   | 0.70<br>(0.20)                             | 0.59+<br>(0.18)                     |
| Child is Female                              | 0.48          | 0.95<br>(0.16)     | 1.30<br>(0.21)               | 1.22<br>(0.18)           | 0.79<br>(0.13)      | 1.05<br>(0.22)          | 0.79<br>(0.13)       | 1.17<br>(0.19)     | 0.86<br>(0.34)            | 0.60*<br>(0.13)          | 0.82<br>(0.16)                   | 0.91<br>(0.15)                             | 1.29<br>(0.22)                      |
| Child Low Birthweight                        | 0.09          | 0.97<br>(0.24)     | 1.29<br>(0.28)               | 1.65*<br>(0.40)          | 1.29<br>(0.30)      | 0.98<br>(0.38)          | 1.30<br>(0.31)       | 1.12<br>(0.25)     | 2.67+<br>(1.43)           | 1.02<br>(0.34)           | 0.57*<br>(0.15)                  | 1.52+<br>(0.36)                            | 1.22<br>(0.31)                      |
| Mother Ever Breast Fed Child                 | 0.60          | 1.10<br>(0.20)     | 1.21<br>(0.22)               | 1.31<br>(0.23)           | 1.22<br>(0.21)      | 1.06<br>(0.24)          | 1.08<br>(0.18)       | 1.51*<br>(0.26)    | 0.69<br>(0.30)            | 1.19<br>(0.27)           | 1.17<br>(0.23)                   | 1.33+<br>(0.22)                            | 1.39+<br>(0.26)                     |
| No English Spoken at Home or Mother Not Born | 0.28          | 0.96               | 1.35                         | 0.73                     | 0.89                | 0.90                    | 0.89                 | 1.42               | 1.04                      | 0.55                     | 0.49*                            | 1.54                                       | 0.99                                |

|                                                |                  |                 |                |                 |                 |                 |                 |                 |                 |                |                |                 |                 |
|------------------------------------------------|------------------|-----------------|----------------|-----------------|-----------------|-----------------|-----------------|-----------------|-----------------|----------------|----------------|-----------------|-----------------|
| in US                                          |                  | (0.25)          | (0.32)         | (0.17)          | (0.22)          | (0.32)          | (0.23)          | (0.38)          | (0.53)          | (0.20)         | (0.14)         | (0.41)          | (0.27)          |
| Mother's Age in Years                          | 30.1<br>(7.1)    | 1.06<br>(0.07)  | 0.96<br>(0.06) | 1.03<br>(0.07)  | 0.98<br>(0.07)  | 1.05<br>(0.10)  | 1.03<br>(0.07)  | 1.04<br>(0.08)  | 2.45<br>(1.11)  | 0.99<br>(0.09) | 0.96<br>(0.07) | 1.15+<br>(0.09) | 1.17+<br>(0.10) |
| Mother's Age <sup>2</sup>                      | 952.9<br>(507.9) | 1.00<br>(0.00)  | 1.00<br>(0.00) | 1.00<br>(0.00)  | 1.00<br>(0.00)  | 1.00<br>(0.00)  | 1.00<br>(0.00)  | 1.00<br>(0.00)  | 0.99+<br>(0.01) | 1.00<br>(0.00) | 1.00<br>(0.00) | 1.00+<br>(0.00) | 1.00+<br>(0.00) |
| Region (Ref: South)                            |                  |                 |                |                 |                 |                 |                 |                 |                 |                |                |                 |                 |
| West                                           | 0.21             | 1.33<br>(0.36)  | 1.03<br>(0.25) | 0.91<br>(0.23)  | 1.21<br>(0.31)  | 0.81<br>(0.27)  | 1.49<br>(0.38)  | 1.34<br>(0.33)  | 1.02<br>(0.53)  | 0.87<br>(0.28) | 1.08<br>(0.26) | 0.71<br>(0.17)  | 1.02<br>(0.28)  |
| Northeast                                      | 0.16             | 2.12*<br>(0.54) | 1.16<br>(0.27) | 0.51*<br>(0.14) | 1.15<br>(0.32)  | 1.54<br>(0.75)  | 1.59+<br>(0.40) | 1.49<br>(0.42)  | 1.11<br>(0.76)  | 1.33<br>(0.44) | 1.25<br>(0.32) | 0.65+<br>(0.16) | 0.64<br>(0.19)  |
| Midwest                                        | 0.18             | 1.36<br>(0.30)  | 0.94<br>(0.21) | 0.86<br>(0.18)  | 1.35<br>(0.31)  | 0.85<br>(0.23)  | 1.13<br>(0.25)  | 1.16<br>(0.26)  | 0.42<br>(0.24)  | 1.15<br>(0.36) | 1.29<br>(0.34) | 0.73<br>(0.15)  | 1.22<br>(0.28)  |
| Percent of Young Children in Poverty in ZIP/10 | 2.4<br>(1.4)     | 1.10<br>(0.08)  | 0.94<br>(0.06) | 0.96<br>(0.06)  | 1.11<br>(0.07)  | 1.00<br>(0.07)  | 1.05<br>(0.07)  | 1.05<br>(0.06)  | 0.79+<br>(0.11) | 1.10<br>(0.09) | 1.01<br>(0.07) | 0.98<br>(0.06)  | 0.98<br>(0.07)  |
| Parent Education (Ref: Parent More than Col.)  |                  |                 |                |                 |                 |                 |                 |                 |                 |                |                |                 |                 |
| Less than High School                          | 0.39             | 1.06<br>(0.34)  | 1.20<br>(0.34) | 1.14<br>(0.34)  | 0.65<br>(0.20)  | 0.82<br>(0.33)  | 0.67<br>(0.19)  | 0.56+<br>(0.18) | 1.27<br>(1.04)  | 1.56<br>(0.63) | 0.99<br>(0.34) | 3.10*<br>(1.07) | 2.61*<br>(1.00) |
| High School Graduate                           | 0.25             | 1.28<br>(0.42)  | 1.12<br>(0.32) | 0.77<br>(0.25)  | 0.57+<br>(0.18) | 1.26<br>(0.54)  | 0.73<br>(0.22)  | 0.51<br>(0.17)  | 2.75<br>(2.35)  | 1.11<br>(0.50) | 0.81<br>(0.29) | 2.08*<br>(0.73) | 1.38<br>(0.54)  |
| Bachelor's Degree                              | 0.30             | 1.27<br>(0.38)  | 1.27<br>(0.33) | 1.06<br>(0.30)  | 0.79<br>(0.22)  | 1.19<br>(0.50)  | 0.72<br>(0.18)  | 0.78<br>(0.25)  | 1.66<br>(1.30)  | 0.94<br>(0.35) | 0.68<br>(0.21) | 1.72+<br>(0.55) | 1.35<br>(0.49)  |
| Income to Needs Ratio                          | 1.1<br>(0.8)     | 0.91<br>(0.10)  | 0.93<br>(0.09) | 1.00<br>(0.10)  | 1.16<br>(0.14)  | 1.43+<br>(0.27) | 0.99<br>(0.10)  | 1.09<br>(0.11)  | 0.53+<br>(0.20) | 1.05<br>(0.13) | 1.14<br>(0.12) | 0.71*<br>(0.09) | 0.76+<br>(0.12) |
| Family Used Food Stamps since Last Interview   | 0.54             | 0.92<br>(0.19)  | 0.82<br>(0.15) | 0.75<br>(0.13)  | 0.80<br>(0.16)  | 0.81<br>(0.22)  | 0.81<br>(0.16)  | 0.75<br>(0.16)  | 0.93<br>(0.43)  | 0.98<br>(0.30) | 0.92<br>(0.21) | 1.29<br>(0.25)  | 1.35<br>(0.32)  |
| Family Used TANF since Last Interview          | 0.18             | 1.18<br>(0.31)  | 1.33<br>(0.31) | 1.50+<br>(0.33) | 1.09<br>(0.25)  | 0.81<br>(0.25)  | 0.82<br>(0.20)  | 1.07<br>(0.26)  | 1.02<br>(0.57)  | 1.14<br>(0.35) | 0.94<br>(0.23) | 1.26<br>(0.26)  | 1.09<br>(0.25)  |

|                                              |                  |                 |                 |                 |                 |                 |                 |                 |                 |                 |                 |                 |                 |
|----------------------------------------------|------------------|-----------------|-----------------|-----------------|-----------------|-----------------|-----------------|-----------------|-----------------|-----------------|-----------------|-----------------|-----------------|
| Child Received WIC since Last Interview      | 0.63             | 1.07<br>(0.19)  | 1.33+<br>(0.21) | 1.36+<br>(0.24) | 1.25<br>(0.21)  | 1.00<br>(0.22)  | 1.11<br>(0.18)  | 1.02<br>(0.18)  | 2.70*<br>(1.20) | 0.90<br>(0.21)  | 1.01<br>(0.19)  | 1.46*<br>(0.24) | 1.50*<br>(0.27) |
| Parent Married                               | 0.46             | 1.24<br>(0.24)  | 1.00<br>(0.18)  | 0.90<br>(0.15)  | 1.21<br>(0.23)  | 1.40<br>(0.37)  | 0.72+<br>(0.13) | 0.91<br>(0.16)  | 1.52<br>(0.68)  | 0.99<br>(0.24)  | 0.60*<br>(0.13) | 1.16<br>(0.22)  | 1.17<br>(0.23)  |
| Mother Employment Status (Ref: Not Employed) |                  |                 |                 |                 |                 |                 |                 |                 |                 |                 |                 |                 |                 |
| Full-time                                    | 0.36             | 1.53*<br>(0.30) | 0.81<br>(0.15)  | 1.08<br>(0.18)  | 1.32<br>(0.25)  | 0.89<br>(0.23)  | 1.12<br>(0.22)  | 1.03<br>(0.19)  | 3.08*<br>(1.30) | 1.28<br>(0.33)  | 0.98<br>(0.21)  | 1.35<br>(0.25)  | 1.50*<br>(0.28) |
| Part-time                                    | 0.19             | 1.77*<br>(0.45) | 0.81<br>(0.17)  | 0.79<br>(0.19)  | 1.35<br>(0.29)  | 1.12<br>(0.33)  | 1.32<br>(0.29)  | 1.28<br>(0.28)  | 0.92<br>(0.54)  | 1.10<br>(0.31)  | 1.26<br>(0.32)  | 0.79<br>(0.18)  | 0.58<br>(0.16)  |
| Any Other Preschool Children in household?   | 0.54             | 1.35<br>(0.24)  | 1.12<br>(0.18)  | 1.37*<br>(0.22) | 0.83<br>(0.14)  | 1.24<br>(0.27)  | 1.09<br>(0.17)  | 0.99<br>(0.17)  | 0.79<br>(0.30)  | 0.68+<br>(0.15) | 0.95<br>(0.17)  | 0.95<br>(0.16)  | 1.09<br>(0.20)  |
| Other School Aged Children in household?     | 0.61             | 1.22<br>(0.22)  | 1.02<br>(0.18)  | 1.33<br>(0.23)  | 1.01<br>(0.18)  | 1.44<br>(0.38)  | 1.17<br>(0.20)  | 0.94<br>(0.17)  | 0.30*<br>(0.13) | 1.08<br>(0.24)  | 1.23<br>(0.23)  | 1.03<br>(0.18)  | 1.33<br>(0.25)  |
| <2 Well-Child Check-Ups                      | 0.17             | 0.83<br>(0.19)  | 1.04<br>(0.21)  | 0.97<br>(0.20)  | 0.79<br>(0.17)  | 1.13<br>(0.31)  | 0.74<br>(0.16)  | 0.76<br>(0.18)  | 0.28<br>(0.22)  | 1.67+<br>(0.45) | 1.18<br>(0.31)  | 1.55*<br>(0.34) | 1.92*<br>(0.44) |
| Household has Rules about Food               | 0.68             | 0.99<br>(0.19)  | 0.76<br>(0.13)  | 1.25<br>(0.22)  | 1.85*<br>(0.33) | 1.51+<br>(0.33) | 1.45*<br>(0.26) | 1.71*<br>(0.30) | 0.62<br>(0.25)  | 1.00<br>(0.24)  | 0.86<br>(0.17)  | 1.17<br>(0.21)  | 1.02<br>(0.21)  |
| Center Director Experience/10                | 0.73             | 1.04<br>(0.13)  | 0.97<br>(0.11)  | 0.93<br>(0.10)  | 1.07<br>(0.12)  | 1.20<br>(0.19)  | 0.94<br>(0.13)  | 0.91<br>(0.10)  | 0.88<br>(0.36)  | 0.94<br>(0.15)  | 1.16<br>(0.13)  | 1.06<br>(0.11)  | 0.89<br>(0.13)  |
| Center Sponsorship Status (Ref: For-Profit)  |                  |                 |                 |                 |                 |                 |                 |                 |                 |                 |                 |                 |                 |
| Sponsored, Non-Profit                        | 0.53             | 0.98<br>(0.22)  | 0.84<br>(0.19)  | 0.66+<br>(0.16) | 0.92<br>(0.22)  | 1.42<br>(0.44)  | 0.94<br>(0.22)  | 0.64*<br>(0.14) | 0.75<br>(0.44)  | 1.28<br>(0.39)  | 1.47+<br>(0.33) | 1.51<br>(0.41)  | 1.43<br>(0.36)  |
| Not Sponsored, Non-Profit                    | 0.29             | 1.37<br>(0.33)  | 1.09<br>(0.24)  | 0.90<br>(0.22)  | 0.97<br>(0.23)  | 1.09<br>(0.32)  | 1.09<br>(0.26)  | 0.70<br>(0.17)  | 0.34<br>(0.25)  | 1.03<br>(0.34)  | 1.08<br>(0.27)  | 1.86*<br>(0.51) | 2.01*<br>(0.51) |
| Center Licensure and Size                    |                  |                 |                 |                 |                 |                 |                 |                 |                 |                 |                 |                 |                 |
| Licensed*Size                                | 108.0<br>(158.5) | 1.00<br>(0.00)  | 1.00<br>(0.00)  | 1.00<br>(0.00)  | 1.00<br>(0.00)  | 1.00<br>(0.00)  | 1.00<br>(0.00)  | 1.00*<br>(0.00) | 1.00<br>(0.00)  | 1.00<br>(0.00)  | 1.00<br>(0.00)  | 1.00<br>(0.00)  | 1.00<br>(0.00)  |

|                                                  |               |                 |                 |                 |                 |                |                |                |                 |                 |                 |                 |                 |
|--------------------------------------------------|---------------|-----------------|-----------------|-----------------|-----------------|----------------|----------------|----------------|-----------------|-----------------|-----------------|-----------------|-----------------|
| Center Licensed                                  | 0.82          | 1.18<br>(0.24)  | 0.98<br>(0.19)  | 1.12<br>(0.22)  | 1.13<br>(0.22)  | 0.82<br>(0.23) | 1.18<br>(0.23) | 0.86<br>(0.16) | 0.82<br>(0.38)  | 0.81<br>(0.23)  | 0.83<br>(0.17)  | 1.35<br>(0.28)  | 1.34<br>(0.31)  |
| Center Accredited                                | 0.55          | 0.84<br>(0.15)  | 0.93<br>(0.15)  | 0.98<br>(0.17)  | 0.77+<br>(0.12) | 0.76<br>(0.18) | 0.78<br>(0.13) | 0.99<br>(0.18) | 3.08*<br>(1.60) | 1.02<br>(0.23)  | 0.88<br>(0.15)  | 0.78<br>(0.13)  | 0.77<br>(0.15)  |
| Food Security at Wave 2 (Ref: Not Food Insecure) |               |                 |                 |                 |                 |                |                |                |                 |                 |                 |                 |                 |
| Household (not children) Are Food Insecure       | 0.13          | 1.15<br>(0.30)  | 0.98<br>(0.24)  | 0.87<br>(0.20)  | 0.79<br>(0.19)  | 1.11<br>(0.32) | 0.72<br>(0.18) | 0.96<br>(0.25) | 1.04<br>(0.57)  | 0.67<br>(0.26)  | 0.56+<br>(0.17) | 2.39*<br>(0.49) | 1.87*<br>(0.44) |
| Household & Children are Food Insecure           | 0.15          | 0.60*<br>(0.13) | 1.03<br>(0.23)  | 0.87<br>(0.21)  | 1.33<br>(0.31)  | 1.14<br>(0.32) | 0.84<br>(0.20) | 1.05<br>(0.27) | 1.48<br>(0.70)  | 0.67<br>(0.17)  | 0.66+<br>(0.15) | 4.38*<br>(1.17) | 3.63*<br>(0.86) |
| Drank Milk with Meals                            | 0.25          | 1.93*<br>(0.48) | 1.92*<br>(0.44) | 0.98<br>(0.22)  | 0.97<br>(0.23)  | 0.91<br>(0.26) | 1.14<br>(0.28) | 0.96<br>(0.24) | 0.87<br>(0.44)  | 1.00<br>(0.32)  | 1.02<br>(0.26)  | 1.38<br>(0.31)  | 0.95<br>(0.24)  |
| Drank Milk with Snacks                           | 0.23          | 2.08*<br>(0.53) | 1.43+<br>(0.31) | 1.04<br>(0.24)  | 1.08<br>(0.23)  | 0.94<br>(0.26) | 0.85<br>(0.19) | 1.03<br>(0.23) | 1.26<br>(0.61)  | 1.41<br>(0.39)  | 1.36<br>(0.28)  | 1.05<br>(0.22)  | 0.70<br>(0.18)  |
| Drank Milk with Meals and Snacks                 | 0.25          | 2.72*<br>(0.68) | 1.91*<br>(0.42) | 1.72*<br>(0.40) | 1.17<br>(0.27)  | 1.29<br>(0.42) | 0.99<br>(0.23) | 1.02<br>(0.24) | 0.81<br>(0.43)  | 0.88<br>(0.27)  | 0.80<br>(0.20)  | 1.65*<br>(0.40) | 0.95<br>(0.24)  |
| Child BMI at Wave 2                              | 17.6<br>(2.5) | 0.94<br>(0.04)  | 0.92*<br>(0.04) | 1.01<br>(0.04)  | 1.03<br>(0.04)  | 1.02<br>(0.05) | 1.05<br>(0.04) | 1.01<br>(0.04) | 0.59*<br>(0.06) | 1.19*<br>(0.06) | 1.27*<br>(0.07) | 1.11*<br>(0.04) | 1.17*<br>(0.05) |

\*p<.05, +p<.10

**Supplemental Table 4. Odds Ratios (OR) from Logistic Regression Models Predicting CACFP Participation for 4-year olds in Center Care, Full and Low-Income Samples.**

|                                                        | Full Sample | Low-Income |
|--------------------------------------------------------|-------------|------------|
|                                                        | OR          | OR         |
| Child Age (months)                                     | 1.00        | 0.98       |
| Child Race (Ref: White)                                |             |            |
| Black                                                  | 1.87*       | 1.52*      |
| Other Race                                             | 1.21        | 1.42+      |
| Hispanic                                               | 1.46*       | 1.10       |
| Child is Female                                        | 0.87+       | 0.83       |
| Child Low Birthweight                                  | 1.03        | 1.03       |
| Child Ever Breast Fed                                  | 0.94        | 0.95       |
| No English Spoken at Home or Mother Not Born in US     | 0.98        | 1.25       |
| Mom Age                                                | 0.89*       | 0.91+      |
| Mom Age <sup>2</sup>                                   | 1.00*       | 1.00       |
| Sampling Weight                                        | 1.00*       | 1.00       |
| Region (Ref: South)                                    |             |            |
| West                                                   | 0.82+       | 0.93       |
| Northeast                                              | 1.15        | 1.09       |
| Midwest                                                | 1.14        | 0.88       |
| Percent of Young Children in Poverty in ZIP code / 10) | 1.29*       | 1.15*      |
| Parent Education (Ref: Parent College or More)         |             |            |
| Less than High School                                  | 2.13*       | 2.74*      |
| High School Graduate                                   | 2.65*       | 4.27*      |
| Bachelor's Degree                                      | 1.69*       | 2.44*      |
| Income-to-Needs Ratio                                  | 0.87*       | 0.98       |
| Family Used Food Stamps since Last Interview           | 1.54*       | 1.52*      |
| Family Used TANF since Last Interview                  | 1.01        | 1.08       |
| Child Received WIC since Last Interview                | 1.69*       | 1.42*      |
| Parent Married                                         | 0.96        | 1.02       |
| Mother Employment Status (Ref: Not Employed)           |             |            |
| Full-time                                              | 1.50*       | 1.11       |
| Part-time                                              | 0.99        | 1.02       |
| Any Other Preschool Aged Children in the Home          | 0.84*       | 0.99       |
| Any School-Aged Children in the Home                   | 1.12        | 1.23       |
| No Well-Child Check-Ups since last interview           | 1.07        | 1.02       |
| Household has Rules about Food                         | 0.89        | 0.85       |
| Center Director Experience/10                          | 0.93        | 1.02       |
| Center Sponsorship Status (Ref: For-Profit)            |             |            |
| Sponsored, Non-Profit                                  | 3.05*       | 3.48*      |
| Not Sponsored, Non-Profit                              | 2.60*       | 2.66*      |
| Center Licensure and Size                              |             |            |

|                                                             |       |       |
|-------------------------------------------------------------|-------|-------|
| Interaction: Center Licensed*Licensed Size                  | 1.00* | 1.00  |
| Center Licensed                                             | 1.64* | 2.07* |
| Center Accredited                                           | 1.89* | 1.73* |
| Food Security at Wave 2 (Ref: Not Food Insecure)            |       |       |
| Household Food Insecure                                     | 1.42* | 1.25  |
| Household and Child Food Insecure                           | 1.79* | 1.68* |
| Child Milk Consumption at Wave 2 (Ref: No Milk Consumption) |       |       |
| Child Drank Milk with Meals                                 | 1.09  | 1.32  |
| Child Drank Milk with Snacks                                | 0.97  | 0.96  |
| Child Drank Milk with Meals and Snacks                      | 1.01  | 1.32  |
| Child BMI at Wave 2                                         | 1.03  | 1.06+ |
| Observations (rounded to nearest 50)                        | 4050  | 1800  |

---

\*  $p < .05$ , +  $p < .10$
